# Supplementary material for: Adsorption-Reduction Behavior of Cr(VI) by Ferrihydrite-Fulvic Acid Complexes with Different C/Fe Mole Ratios
Source: Hindawi journal article supplement (doi:10.1155/2023/5716199), 2023-01-01
Supplement: f1 [file 5716199.f1.docx]

**Supplementary Information**

**Adsorption-reduction behavior of Cr(VI) by ferrihydrite-fulvic acid complexes with different C/Fe ratios**

Yangyang Zhang1,2,3, Yuxin Chen1, Junwen An1, Xiaofei Zhao1,2,3, Bo Zu1*

1College of River and Ocean Engineering, Chongqing Jiaotong University, Chongqing 400074, China

2Chongqing Bureau of Geology and Mineral Resources, Chongqing 401121, China

3Chongqing Gangli Environmental Protection Co., LTD, Chongqing 400042, China

1. **Kinetic model**

The pseudo-first order kinetic model based on the solid adsorption volume is the most common kinetic equation. The pseudo-first order kinetics applied to liquid-phase adsorption is as follows:

(1.1)

Where:- the amount of adsorption when the reaction reaches equilibrium (mg/g);

--the amount of adsorption at t min (mg/g);

k1 - the pseudo-first order kinetic rate constant of the adsorption process (min-1 ), which can be obtained from the slope of the line obtained by plotting ln (qe - qt ) versus t.

The pseudo-second order kinetic model assumes chemisorption as the limiting factor of the adsorption process, the pseudo-second order kinetics equation is as follows:

(1.2)

Where: - the amount of adsorption when the reaction reaches equilibrium (mg/g);

--the amount of adsorption at t min (mg/g);

k2 - the pseudo-second order kinetic rate constant [L/(mg-min)] of the adsorption process, which can be derived from the slope of the straight line between t/qt and t(min-1 ).

1. **Isothermal model**

The Langmuir and Freundlich models were used to fit the nonlinear isothermal adsorption of Cr(VI) on each mineralization product.The Langmuir isothermal adsorption model assumes that the adsorbent surface adsorption sites are all the same and that the effect on the adsorbate is monolayer surface adsorption . The model equations are as follows:

The Langmuir isotherm equation is as follows: The

(2.1)

Where: qe - adsorption capacity (mg/g);

qm - maximum adsorption capacity (mg/g);

K - Langmuir coefficient (L/mg);

Ce - equilibrium solute concentration (mg/L).

The Freundlich isothermal adsorption model assumes that the surface properties of the adsorbent are non-uniform and that the effect on the adsorbent is multilayer surface adsorption.[61] . The Freundlich model equations is as follows:

(2.2)

Where: K - Freundlich constant.

n - constant associated with the inhomogeneity of the adsorption sites.
